## 14 **Abstract**

15 Objectives. To understand how Native women seek support as survivors of intimate partner  
16 violence by examining factors associated with seeking formal support (e.g., medical, police),  
17 informal support (e.g., family, friends), or both types of support.

18 Methods. Data from the 2010 National Intimate and Sexual Violence Survey were analyzed  
19 among the AIAN oversamples. Descriptive statistics and odds ratio analyses were conducted to  
20 observe significant factors that are associated with adult Native women survivors seeking  
21 support.

22 Results. Survivors have higher odds of seeking informal supports than formal supports. Formal  
23 support is not often sought, however survivors had significantly higher odds of seeking therapy.

24 Conclusions. While there are various avenues in which survivors may seek support, not all types  
25 of support are helpful to the survivor's needs. However, this study is still valuable in  
26 distinguishing factors related to support-seeking and observing general relationships. Focused  
27 and intentional public health research on support for AIAN women survivors is needed to further  
28 understand how programs and policies can be improved.

29

## 30 **Introduction**

31 Intimate partner violence (IPV) is the most common type of violence experienced by  
32 American Indian/Alaska Native (AIAN) women and is a significant public health issue. [1–4].<sup>2</sup>  
33 A 2016 report from the National Intimate Partner and Sexual Violence Survey (NISVS) revealed  
34 that more than four in five (84.3%) AIAN adult (ages 18-64) women have experienced violence  
35 in their lifetime and more than one in three AIAN adult women experienced violence in the past  
36 year. Of these women, 14.4% experienced sexual violence, 8.6% experience physical violence  
37 by an intimate partner, 25.5% experienced psychological aggression by an intimate partner, and  
38 11.6% experienced stalking [4]. AIAN women are at a significantly higher risk of experiencing  
39 stalking and physical violence by an intimate partner in their lifetime than their non-Hispanic  
40 White-only counterparts [1,2,5]. In addition, they are significantly more likely to experience  
41 psychological aggression by an intimate partner in their lifetime in the past year [4]. Such  
42 experiences of violence severely impact AIAN women’s physical, mental, emotional, and  
43 spiritual well-being [5,6]. For the purpose of this research, IPV refers to four types of behaviors  
44 perpetrated by a current or former spouse, and dating partners: physical violence, sexual  
45 violence, stalking, and psychological aggression [7].

## 46 **Support seeking**

47 Effective and relevant services are needed for AIAN women survivors of violence.  
48 According to findings from the NISVS, among AIAN adult women surveyed, 38% of women  
49 needed medical care, 16% needed legal services, 11% needed housing services, and 9% needed  
50 advocacy services. However, 38% of AIAN women were unable to get the services they needed.

---

<sup>2</sup> Moving forward, “Native American,” “Native,” “American Indian,” “AIAN,” and “Indigenous” are used interchangeably depending on the context.

51 Further, they face various barriers to seeking needed services. AIAN women were found to be  
52 2.5 times as likely as non-Hispanic White-only women to lack access to needed services [4].

53 While interventions that focus on positive social support may benefit victims, the  
54 magnitude of the impact is small [8]. Individual barriers include factors that deter the woman  
55 from seeking support due to her perceptions regarding the resources available to her. Systemic  
56 barriers include factors outside of the individual's control that may prevent the woman from  
57 seeking support. AIAN women are unlikely to report their experiences to the police due to fear  
58 of being judged, fear of not being believed, fear of being stereotyped as a Native person, and fear  
59 that authorities will not understand [9]. Women may also turn away from seeking support in fear  
60 of being blamed and stigmatized for their experience [10]. The added layer of Native identity is  
61 often difficult to navigate in settings where AIAN women are more likely to experience  
62 discrimination based on their ethnicity.

63 Numerous studies on the support-seeking behaviors among survivors of IPV indicate  
64 various factors that may encourage victims to seek support. Fleming & Resick (2017) reported  
65 that age, depression, psychological aggression, PTSD, perceived helpfulness of resource, and  
66 perceived controllability of violence were significantly related to support-seeking behavior. High  
67 levels of education and employment are found to be positively associated with support-seeking  
68 behaviors [11,12]. Women who also have more autonomy and decision-making agency may  
69 increase their likelihood of seeking support. Conversely, more autonomy and decision making  
70 can also lead to women not seeking support due to fear of what may happen once they do seek  
71 support [12]. If the woman has a child, her decision to seek support is further influenced by  
72 seeking options that meet the best interests of the child (such as seeking alternative housing

73 options). This indicates a need for policies and programs that protect both the mother and child  
74 [13].

75 Survivors are more likely to seek informal support (e.g., friends and family) than seek  
76 formal support (e.g., police or medical professional) [11,14,15]. When the violence is severe,  
77 women are more likely to seek either informal or formal support [11,12,16]. However, if women  
78 perceive the violence as justified or engage in self-blaming behavior, they may be less likely to  
79 seek support in general [11].

80 Informal support may lead to seeking formal support. For instance, domestic violence  
81 survivors who sought informal support also decided to seek formal support if the family or friend  
82 they disclosed to had experienced or had knowledge of domestic violence [17]. For Native  
83 women, informal care is often protective if the family or social network is tight-knit, supportive,  
84 and affirming. However, if there is a risk of breaching confidentiality and lack of accountability  
85 [18], women are less likely to access informal network for support and may seek formal support  
86 [16].

87 The intent of this study is to understand how Native women seek support as survivors of  
88 intimate partner violence. The 2010 National Intimate and Sexual Violence Survey is the most  
89 recent data available, and the AIAN oversample was analyzed. Descriptive statistics and odds  
90 ratio analyses were conducted to observe significant factors associated with survivors seeking  
91 support.

## 92 **Methods**

### 93 **Data**

94 Secondary data analysis was conducted using data from the 2010 National Intimate and  
95 Sexual Violence Survey (NISVS). The survey is maintained by the Centers for Disease Control

96 and Prevention (CDC) and provides the most recent, nationally representative data on violence  
97 against woman. The NISVS is the most comprehensive on-going survey that contains national-  
98 and state-level data on intimate partner violence, sexual violence, and stalking victimization in  
99 the United States [7]. This dataset contains an oversample of AIAN individuals on the various  
100 experiences of violence, perpetrator-level data, and the support-seeking behavior among victims  
101 of violence. The AIAN oversample raw data are what this project utilized. From January 22 to  
102 December 31, 2010, sampling of the AIAN population was maximized via landline telephone  
103 exchanges where at least 50% of the population was estimated to be AIAN, which included a  
104 total of 16 states in North America.

## 105 **Ethics statement**

106 The study was approved by Oregon State University’s Institutional Review Board (IRB-2019-  
107 0409). The dataset was obtained with IRB approval through ICPSR data repository (ICPSR  
108 36140).

## 109 **Statistical analysis**

110 The study sample used in the empirical analysis was limited to AIAN women who  
111 reported having experienced IPV in their lifetime and were between the ages 18-64 at the time of  
112 survey (N=1275). A logistic regression model was utilized as follows:

$$113 \quad \ln\left[\frac{\Pr(y_i = 1)}{1 - \Pr(y_i = 1)}\right] = X_i b \quad (\text{Eq. 1})$$

114 where  $y_i$  refers to support-seeking behavior (support only, informal support only, or both formal  
115 and informal supports) for individual  $i$ , and  $e$  is the idiosyncratic error term. “ $X_i$ ” include all  
116 factors that may be associated with support-seeking behavior at individual, relational,  
117 community, and systemic levels. “ $b$ ” is a vector of coefficients. Several sensitivity and  
118 specification analyses were performed. A linear probability model (LPM) via ordinary least

119 squares (OLS) was estimated as this estimation technique renders consistent and unbiased  
120 parameter estimates for binary outcomes.

121 Descriptive statistics are reported without weights due to the high number of missing  
122 observations with weights applied. Data analysis was completed via Stata 15, a statistical  
123 software package for data management and analysis [19].

## 124 **Results**

125 Descriptive statistics (Table 1) reveal that among AIAN women between 18 to 64 years old  
126 who experienced IPV in their lifetime (N=1275), 55.9% sought formal support only, 77.4%  
127 sought informal support only, and 50.8% sought both formal and informal types of support. The  
128 average age is 41 years old. Of this sample, 80.8% are enrolled in a tribe. 80.7% of the  
129 respondents report ever having a child live with them. Few report being gay or lesbian (0.6%), or  
130 bisexual (3.0%), and 87.1% identify as heterosexual. 36.6% report as being married, 34.8%  
131 report being never married and 20.5% report being divorced, separated, or widowed. Perceived  
132 physical and mental health statuses are indicated on a scale of one to five, with one being the  
133 worst and five being the best. The mean perceived health status is 3.1 and the perceived mental  
134 health status is 3.5.

135 Household income was divided into three ranges based on the median income among  
136 AIANs [20]. 40.5% of respondents are in the low-income range of less than \$20k, 78.5% are in  
137 the middle-income range of \$20k to less than \$50k, and 18.4% are in the high-income range of  
138 earning \$50k or more. Educational attainment was divided into five categories: primary  
139 education or some high school (15.5%), high school diploma (28.9%), vocational school (4.6%),  
140 some college (32.5%), and college diploma or above (18.4%).

141 Specific types of formal (e.g., police, medical, therapy) and informal (family, friend,  
142 intimate partner) supports were examined for the percentage of respondents who sought a  
143 specific type of support, and if they found it to be helpful. A service was considered helpful in  
144 this instance if the respondent indicated that the service was a little, somewhat, or very helpful.  
145 For instance, 45.1% of respondents sought police support, and of these respondents 76.7%  
146 indicated that it was helpful. 26.7% of respondents sought medical support and 87.7% indicated  
147 that it was helpful. Less than half of the respondents sought therapy (35.2%) but 93.3% indicated  
148 that it was helpful. Among those who sought informal support 62.2% reached out to family, and  
149 93.5% reported it was helpful. 68.7% sought informal support from a friend, and 96.8% of those  
150 respondents reported that it was helpful. Friends may include friends, coworkers, acquaintances,  
151 or other non-family and friend relationships. Lastly, 28.7% sought support from an intimate  
152 partner, and 93.7% of those reported that it was helpful.

153 Table 1. Variables, Definitions, and Summary Statistics

| Variables                    | Frequency (N=1275) | Sample mean or % |
|------------------------------|--------------------|------------------|
| <i>Dependent Variables</i>   |                    |                  |
| Formal support only          | 713                | 55.9%            |
| Informal support only        | 987                | 77.4%            |
| Formal and Informal support  | 647                | 50.8%            |
| <i>Demographic</i>           |                    |                  |
| Age 18-64yrs (SD)            |                    | 41 (13.3)        |
| Enrolled in tribe            | 1021               | 80.8%            |
| Ever had child live with you | 1028               | 80.7%            |
| <i>Sexual Orientation</i>    |                    |                  |
| Heterosexual*                | 1110               | 87.1%            |
| Gay/lesbian                  | 7                  | 0.6%             |
| Bisexual                     | 38                 | 3.0%             |
| <i>Household Income</i>      |                    |                  |

|                                                    |      |           |
|----------------------------------------------------|------|-----------|
| Low (< \$20k)                                      | 516  | 40.5%     |
| Middle (\$20k to < \$50k)                          | 1001 | 78.5%     |
| High (\$50k+)*                                     | 235  | 18.4%     |
| <i>Marital Status</i>                              |      |           |
| Married*                                           | 467  | 36.6%     |
| Divorced, separated, or widowed                    | 267  | 20.5%     |
| Never married                                      | 444  | 34.8%     |
| <i>Education level</i>                             |      |           |
| Primary education or some high school*             | 197  | 15.5%     |
| High school diploma                                | 369  | 28.9%     |
| Vocational school                                  | 58   | 4.6%      |
| Some college                                       | 414  | 32.5%     |
| College diploma or above                           | 235  | 18.4%     |
| <i>Health status</i>                               |      |           |
| Perceived physical health status (1-5)<br>(SD)     |      | 3.1 (1.1) |
| Perceived mental health status (1-5)<br>(SD)       |      | 3.5 (1.1) |
| <i>Services sought and quality (=1 if helpful)</i> |      |           |
| Police                                             | 538  | 45.1%     |
| Police quality                                     | 412  | 76.7%     |
| Medical                                            | 319  | 26.7%     |
| Medical quality                                    | 277  | 87.7%     |
| Therapy                                            | 419  | 35.2%     |
| Therapy quality                                    | 389  | 93.3%     |
| Family                                             | 742  | 62.2%     |
| Family quality                                     | 653  | 93.5%     |
| Intimate partner                                   | 342  | 28.7%     |
| Intimate partner quality                           | 224  | 93.7%     |
| Friend                                             | 820  | 68.7%     |
| Friend quality                                     | 787  | 96.8%     |

154 *\*Reference variable*

## 155 **Formal, informal, and both types of support**

156 In this first stage of analysis (Table 2), formal support included medical, legal services,  
157 community advocacy, and housing services. Informal support included family, friends, and  
158 intimate partners. Adjusted odds ratios were calculated using logistic regression analysis with  
159 robust standard errors for adult AIAN women survivors who experienced IPV in their lifetime.  
160 Compared to those who are married, those who are divorced, separated, or widowed have higher  
161 odds of seeking formal support (adjusted OR=2.23, 95% CI=1.61 to 3.09) and seeking both  
162 formal and informal supports (OR=1.89, 95% CI= 1.39 to 2.58). Compared to those who never  
163 had a child live with them, the odds of seeking informal support only are 1.46 times (95%  
164 CI=1.05 to 2.04) as high for women who ever had a child live with them. The odds of seeking  
165 both types of support for women who ever had a child live with them is 1.39 times (95% CI=  
166 1.03 to 1.87) as high. Compared to adult AIAN women survivors with high household income,  
167 those with low household income have lower odds of seeking informal support (OR=0.65, 95%  
168 CI=0.47 to 0.90). Those who live with middle household income are 1.37 times (95% CI=1.00 to  
169 1.88) as likely to seek both formal and informal types of support. Compared to those who  
170 completed primary education or attended some high school, women who attended vocational  
171 school have higher odds of seeking informal support (OR=2.59, 95% CI=1.09 to 6.09). Those  
172 who have a college diploma or above also have higher odds of seeking informal support  
173 (OR=1.73, 95% CI=1.03 to 2.89).

174

175

176

177 Table 2. Adjusted ORs for types of support

|                                                                     | Formal Only               | Informal Only           | Formal & Informal         |
|---------------------------------------------------------------------|---------------------------|-------------------------|---------------------------|
|                                                                     | Adjusted OR<br>(95% CI)   | Adjusted OR<br>(95% CI) | Adjusted OR<br>(95% CI)   |
| <i>Demographic</i>                                                  |                           |                         |                           |
| Age 18-64 years                                                     | 1.004<br>(0.993-1.015)    | 0.994<br>(0.982-1.007)  | 1.002<br>(0.992-1.013)    |
| Enrolled in tribe                                                   | 1.082<br>(0.806-1.452)    | 0.970<br>(0.684-1.374)  | 1.047<br>(0.784-1.399)    |
| Ever had child live with you                                        | 1.344<br>(0.999-1.809)    | 1.463*<br>(1.049-2.039) | 1.386*<br>(1.029-1.868)   |
| <i>Sexual Orientation (Reference: Heterosexual)</i>                 |                           |                         |                           |
| Gay/lesbian                                                         | 1.088<br>(0.246-4.809)    | 2.163<br>(0.318-14.694) | 0.752<br>(0.198-2.854)    |
| Bisexual                                                            | 1.838<br>(0.906-3.730)    | 1.958<br>(0.789-4.860)  | 1.576<br>(0.793-3.133)    |
| <i>Household Income (Reference: High income - \$50k+)</i>           |                           |                         |                           |
| Low income (<\$20k)                                                 | 1.041<br>(0.789-1.374)    | 0.652*<br>(0.470-0.903) | 0.834<br>(0.636-1.094)    |
| Middle income (\$20k to < \$50k)                                    | 1.249<br>(0.911-1.712)    | 1.390<br>(0.942-2.051)  | 1.373*<br>(1.001-1.883)   |
| <i>Marital Status (Reference: Married)</i>                          |                           |                         |                           |
| Divorced, separated, or widowed                                     | 2.233***<br>(1.610-3.098) | 1.250<br>(0.85-1.838)   | 1.890***<br>(1.386-2.576) |
| Never married                                                       | 0.900<br>(0.668-1.210)    | 0.711<br>(0.495-1.023)  | 0.908<br>(0.676-1.221)    |
| <i>Education (Reference: Primary education or some high school)</i> |                           |                         |                           |
| High school diploma                                                 | 1.206<br>(0.834-1.743)    | 0.999<br>(0.671-1.491)  | 1.140<br>(0.791-1.643)    |
| Vocational school                                                   | 1.352<br>(0.732-2.498)    | 2.586*<br>(1.098-6.093) | 1.405<br>(0.764-2.582)    |
| Some college                                                        | 1.359<br>(0.934-1.978)    | 1.437<br>(0.944-2.187)  | 1.313<br>(0.906-1.903)    |
| College diploma or above                                            | 1.410<br>(0.905-2.196)    | 1.726*<br>(1.032-2.888) | 1.367<br>(0.883-2.117)    |
| <i>Health Status</i>                                                |                           |                         |                           |
| Perceived physical health status                                    | 0.903<br>(0.794-1.027)    | 1.009<br>(0.872-1.169)  | 0.921<br>(0.811-1.045)    |
| Perceived mental health status                                      | 0.918<br>(0.811-1.039)    | 1.056<br>(0.916-1.217)  | 0.958<br>(0.848-1.084)    |

178 \* p<0.05, \*\* p<0.01, \*\*\* p<0.001

179 **Formal supports**

180 Closer analysis of specific types of support, namely police, medical, and therapy were  
 181 conducted (Table 3). Compared to adult AIAN women survivors who are married, divorced,  
 182 separated, or widowed adult AIAN women who experienced IPV in their lifetime have higher  
 183 odds of seeking law enforcement support (OR=1.93, 95% CI=1.41 to 2.63) and higher odds of  
 184 seeking therapy (OR=1.80, 95% CI=1.32 to 2.47). Those who never married are at lower odds of  
 185 seeking medical support (OR=0.67, 95% CI=0.46 to 0.98) than those who are married.  
 186 Compared to those who completed primary education or attended some high school, women who  
 187 attended vocational school have odds as 1.98 times (CI= 1.00 to 3.91) as high of seeking medical  
 188 care. Odds for seeking therapy are 1.86 times (95% CI=1.22 to 2.85) as high among those with  
 189 some college experience and 1.99 times (95% CI=1.21 to 3.29) as high among those with a  
 190 college diploma or higher. For every one-point increase in perceived mental health status, there  
 191 are lower odds of seeking medical support (OR=0.78, 95% CI=0.68 to 0.91) and therapy  
 192 (OR=0.83, 95% CI=0.73 to 0.95).

193 Table 3. Adjusted ORs of specific types of formal support

|                                                          | Police                  | Medical                 | Therapy                 |
|----------------------------------------------------------|-------------------------|-------------------------|-------------------------|
|                                                          | Adjusted OR<br>(95% CI) | Adjusted OR<br>(95% CI) | Adjusted OR<br>(95% CI) |
| <i>Demographic</i>                                       |                         |                         |                         |
| Age 18-64 years                                          | 1.003<br>(0.992-1.013)  | 1.004<br>(0.993-1.016)  | 0.997<br>(0.986-1.009)  |
| Enrolled in tribe                                        | 1.117<br>(0.826-1.512)  | 1.019<br>(0.729-1.426)  | 0.975<br>(0.717-1.327)  |
| Ever had child<br>live with you                          | 1.210<br>(0.887-1.651)  | 1.079<br>(0.765-1.520)  | 0.934<br>(0.681-1.281)  |
| <i>Sexual Orientation (Reference: Heterosexual)</i>      |                         |                         |                         |
| Gay/lesbian                                              | 1.625<br>(0.352-7.511)  | 1.194<br>(0.249-5.727)  | 1.369<br>(0.352-5.326)  |
| Bisexual                                                 | 0.898<br>(0.444-1.818)  | 0.801<br>(0.364-1.762)  | 1.611<br>(0.826-3.142)  |
| <i>Household income (Reference: High income- \$50k+)</i> |                         |                         |                         |

|                                                                     |                           |                          |                           |
|---------------------------------------------------------------------|---------------------------|--------------------------|---------------------------|
| Low income (<\$20k)                                                 | 1.113<br>(0.842-1.471)    | 1.200<br>(0.878-1.641)   | 0.843<br>(0.626-1.135)    |
| Middle income (\$20k to < \$50k)                                    | 1.042<br>(0.747-1.453)    | 1.071<br>(0.723-1.588)   | 1.123<br>(0.793-1.590)    |
| <i>Marital status (Reference: Married)</i>                          |                           |                          |                           |
| Divorced, separated, or widowed                                     | 1.927***<br>(1.411-2.632) | 1.372<br>(0.983-1.916)   | 1.803***<br>(1.316-2.470) |
| Never married                                                       | 1.010<br>(0.741-1.377)    | 0.670*<br>(0.460-0.975)  | 0.764<br>(0.549-1.064)    |
| <i>Education (Reference: Primary education or some high school)</i> |                           |                          |                           |
| High school diploma                                                 | 0.973<br>(0.666-1.421)    | 1.314<br>(0.841-2.054)   | 1.234<br>(0.799-1.903)    |
| Vocational school                                                   | 1.011<br>(0.542-1.888)    | 1.979*<br>(1.002-3.908)  | 1.827<br>(0.939-3.554)    |
| Some college                                                        | 1.056<br>(0.723-1.540)    | 1.526<br>(0.987-2.360)   | 1.864**<br>(1.219-2.852)  |
| College diploma or above                                            | 0.831<br>(0.530-1.305)    | 1.047<br>(0.617-1.791)   | 1.991**<br>(1.207-3.286)  |
| <i>Health Status</i>                                                |                           |                          |                           |
| Perceived physical health status                                    | 0.896<br>(0.784-1.023)    | 1.028<br>(0.876-1.205)   | 0.906<br>(0.786-1.043)    |
| Perceived mental health status                                      | 1.057<br>(0.930-1.202)    | 0.783**<br>(0.676-0.906) | 0.831**<br>(0.726-0.953)  |

194 \* p<0.05, \*\* p<0.01, \*\*\* p<0.001

## 195 **Informal supports**

196 Three types of informal supports were examined: family, friend, and intimate partner.  
 197 (Table 4) Compared to adult AIAN women survivors who are married, those who never married  
 198 had lower odds of seeking family support (OR=0.66, 95% CI=0.48 to 0.91) and lower odds of  
 199 seeking support from their current intimate partner (OR=0.46, 95% CI=0.32 to 0.66). Those who  
 200 are divorced, separated, or widowed have lower odds (OR=0.56, 95% CI= 0.39 to 0.80) of  
 201 seeking support from an intimate partner. Compared to adult AIAN women with high household  
 202 income, those in low-income households have lower odds of seeking support from an intimate

203 partner (OR=0.71, 95% CI=0.52 to 0.98). Compared to respondents who completed primary  
 204 school or attended some high school, odds are 2.20 times (95% CI=1.12 to 4.30) as high for  
 205 seeking support from an intimate partner among those who attended vocational school and 1.77  
 206 times (95% CI=1.05 to 2.97) as high among those who have a college diploma or higher. For  
 207 every one-year increase in age, odds of seeking support from an intimate partner decrease  
 208 (OR=0.98, 95% CI=0.97 to 0.99). Compared to those who are not enrolled in a tribe, the odds of  
 209 adult AIAN women survivors seeking support from a friend is 8.33 times as high (95% CI=4.81  
 210 to 14.42).

211 Table 4. Adjusted ORs of specific types of informal support

|                                                          | Family                  | Friend                     | Intimate Partner          |
|----------------------------------------------------------|-------------------------|----------------------------|---------------------------|
|                                                          | Adjusted OR<br>(95% CI) | Adjusted OR<br>(95% CI)    | Adjusted OR<br>(95% CI)   |
| <i>Demographic</i>                                       |                         |                            |                           |
| Age 18-64 years                                          | 0.995<br>(0.984-1.006)  | 0.990<br>(0.964-1.018)     | 0.980**<br>(0.968-0.992)  |
| Enrolled in tribe                                        | 1.018<br>(0.749-1.382)  | 8.330***<br>(4.814-14.415) | 0.816<br>(0.590-1.127)    |
| Ever had child<br>live with you                          | 1.169<br>(0.861-1.587)  | 0.942<br>(0.454-1.954)     | 0.869<br>(0.621-1.217)    |
| <i>Sexual Orientation (Reference: Heterosexual)</i>      |                         |                            |                           |
| Gay/lesbian                                              | 0.941<br>(0.211-4.195)  | 0.324<br>(0.037-2.857)     | 1.135<br>(0.228-5.642)    |
| Bisexual                                                 | 0.709<br>(0.366-1.377)  | 2.170<br>(0.434-10.865)    | 1.660<br>(0.807-3.414)    |
| <i>Household income (Reference: High income- \$50k+)</i> |                         |                            |                           |
| Low income<br>(<\$20k)                                   | 0.791<br>(0.595-1.052)  | 1.416<br>(0.697-2.876)     | 0.714*<br>(0.519-0.982)   |
| Middle income<br>(\$20k to < \$50k)                      | 1.213<br>(0.868-1.695)  | 1.273<br>(0.636-2.550)     | 0.727<br>(0.516-1.023)    |
| <i>Marital status (Reference: Married)</i>               |                         |                            |                           |
| Divorced,<br>separated, or<br>widowed                    | 0.776<br>(0.564-1.067)  | 1.476<br>(0.708-3.075)     | 0.559**<br>(0.390-0.801)  |
| Never married                                            | 0.662*<br>(0.482-0.909) | 1.320<br>(0.590-2.951)     | 0.462***<br>(0.324-0.656) |

| <i>Education (Reference: Primary education or some high school)</i> |                        |                        |                         |
|---------------------------------------------------------------------|------------------------|------------------------|-------------------------|
| High school diploma                                                 | 0.740<br>(0.505-1.085) | 0.527<br>(0.207-1.344) | 1.181<br>(0.743-1.876)  |
| Vocational school                                                   | 1.208<br>(0.628-2.322) | 0.670<br>(0.152-2.960) | 2.197*<br>(1.123-4.298) |
| Some college                                                        | 0.921<br>(0.628-1.350) | 0.696<br>(0.251-1.934) | 1.509<br>(0.966-2.359)  |
| College diploma or above                                            | 0.947<br>(0.601-1.493) | 0.798<br>(0.266-2.400) | 1.767*<br>(1.053-2.966) |
| <i>Health Status</i>                                                |                        |                        |                         |
| Perceived physical health status                                    | 1.001<br>(0.876-1.145) | 1.048<br>(0.784-1.400) | 0.890<br>(0.762-1.039)  |
| Perceived mental health status                                      | 1.127<br>(0.992-1.280) | 1.253<br>(0.946-1.660) | 1.113<br>(0.959-1.291)  |

212 \* p<0.05, \*\* p<0.01, \*\*\* p<0.001

## 213 Discussion

214 Formal support alone is not often sought out. However, among the formal supports, there  
 215 are higher odds of seeking therapy. Formal supports seem to have higher odds of being utilized  
 216 when informal supports are also sought, particularly among divorced, separated, or widowed  
 217 women, those who ever had a child live with them, and those in middle income households. The  
 218 odds of seeking police were only significant high with divorced, separated, or widowed women.  
 219 They also have significantly higher odds of seeking therapy. Police is not often regarded as a  
 220 support as there is general mistrust towards law enforcement and the criminal justice system  
 221 among AIAN communities. Attitudes towards law enforcement are that there are delays and that  
 222 they are insufficient in providing protection for the victim [9]. There may also be issues with  
 223 trusting the overall criminal justice system as the perpetrator may not be adequately held  
 224 accountable, or there may be a lack of consistency in how the case is handled. While the results  
 225 of seeking police are unsurprising, this study initiates further inquiry on why divorced, separated,

226 or widowed women have higher odds of seeking support from the police. Police may become  
227 involved if the abuser is an ex-partner as studies indicate that perpetrators are the most violent  
228 when women try to separate from their abusive partners [21]. While there were no significant  
229 odds of seeking specific types of support among those who ever had a child live with them, it is  
230 important to note that other types of formal support that were not included in this analysis, such  
231 as legal and housing supports.

232 Those who attended vocational school have significantly higher odds of seeking medical  
233 support. Those who are never married or with better perceived mental health status had lower  
234 odds of seeking medical support. Seeking health services are intertwined with fears of being  
235 victim-blamed and being subjected to negative assumptions [10]. There are significantly higher  
236 odds of seeking therapy among those who are divorced, separated, or widowed, those with some  
237 college experience, and those with a college diploma or higher. However, it is unclear whether  
238 this is associated with reasons such as access to campus resources, increased awareness of  
239 therapy services, or reduced stigma regarding mental healthcare.

240 Seeking only informal support appears to be more common, particularly among those  
241 who showed significant higher odds, such as those who ever had a child live with them, those  
242 who attended vocational school, and those with a college diploma or higher. However, closer  
243 examination reveals no higher odds of seeking family support, and those who were never  
244 married had significantly lower odds of seeking family support. Compared to those who  
245 completed primary school or attended some high school those went to vocational school or have  
246 a college diploma or above have significantly higher odds of seeking support from an intimate  
247 partner. Factors such as being divorced, separated, or widowed, being never married, low  
248 household income, and age have significantly lower odds of seeking support from a friend.

249 Tribal enrollment had significantly higher odds (OR=8.33, 95% CI=4.81 to 14.42) of seeking  
250 support from a friend. The majority (81%) of respondents reported being enrolled, which may  
251 contribute to the result.

252 This study provides ample opportunity to inquire further about support-seeking behavior  
253 among adult AIAN women survivors of IPV. For instance, the odds of seeking police support  
254 were higher (though not significant) for most of the variables, except for those who are bisexual,  
255 those with a high school diploma and perceived physical health status. From Table 1, 45% of  
256 respondents sought the police but 77% of those who sought the police considered it to be helpful.  
257 This prompts future research on how survivors define “helpful” and whether their needs were  
258 qualitatively met through police support. Odds ratio analyses show that attending vocational  
259 school or having a college diploma have higher odds for seeking support from a friend, but lower  
260 odds for multiple variables. Only 29% of respondents report seeking support from an intimate  
261 partner, but 94% of those perceive it to be helpful. Intimate partners could potentially be a  
262 supportive resource for survivors, but education on how to engage with survivors and support  
263 them may be in need- especially for those who are divorced, separated, or widowed, those who  
264 never married, those with low household income, and those who are older in age. While 69% of  
265 respondents sought support from a friend and of those 97% perceived it to be helpful, the only  
266 significant relationship was observed with tribal enrollment (OR=8.33, 95% CI=4.81 to 14.42).  
267 Those living on reservations are likely to be enrolled. However, there are many urban AIANs  
268 who are also enrolled. Further research is needed to understand the relationship between tribal  
269 enrollment and seeking support from a friend. In addition, AIANs who are aware of their tribal  
270 affiliations but do not have enrollment for any reason may present similar or different  
271 relationship to seeking support.

## 272 **Limitations**

273           In this study, odds ratios were calculated to understand the general relationships between  
274 various individual, community, relational, and systemic factors with support-seeking behavior.  
275 However, there is much that is yet to be understood regarding AIAN women’s experiences with  
276 seeking support. The dataset focuses on the individual’s behavior in a limited time-frame relative  
277 to the specific experiences of victimization reported and does not adequately capture the societal  
278 and cultural barriers that the women may experience. Follow-up studies that qualitatively inquire  
279 the nuances of support seeking behavior may provide valuable insights.

## 280 **Public health implications**

281           Systemic barriers to seeking care include lack of funding for shelters or health centers,  
282 and fear that medical and legal personnel are not sympathetic towards Natives due to  
283 misperceptions, stereotypes, and prejudice. There are also systemic delays in health care services  
284 due to the perception that the Bureau of Indian Affairs or the Indian Health Service provides all  
285 needed assistance. Further, there is lack of coordination among law enforcement operating under  
286 a fragmented criminal justice system. This is unfortunately not unique to the United States, as it  
287 is stated to be a critical issue even in Canada (Razack, 2016).

288           Given the significant high risk of IPV among adult AIAN women, there is an urgent need  
289 for adequate survivor support. While there are various avenues in which survivors may seek  
290 support, there is limited understanding as to how these decisions are made and what factors play  
291 significant roles in this process. This study provides insight into how certain factors inform the  
292 odds of seeking support. The helpfulness of a specific type of support does not provide clarity on  
293 the decision-making processes of support-seeking behavior and the nuances that come with  
294 access, cultural barriers, and victim-blaming. However, this study is still valuable in

295 distinguishing factors related to support-seeking and observing general relationships. Focused  
296 and intentional public health research on support for AIAN women survivors is needed to further  
297 understand how programs and policies can be improved.

## 298 **Acknowledgements**

299 I thank Monique Castro, LMFT from the Indigenous Circle of Wellness and Dr. Carrie Johnson  
300 from Seven Generations Child & Family Services for their support. I also thank Dr. Jangho Yoon  
301 for providing guidance for the conceptual framework and analysis.

## 302 **References**

- 303 1. Bachman R, Zaykowski H, Lanier C, Poteyeva M, Kallmyer R. Estimating the Magnitude of  
304 Rape and Sexual Assault Against American Indian and Alaska Native (AIAN) Women.  
305 *Aust N Z J Criminol.* 2010 Aug 1;43(2):199–222.
- 306 2. Deer S. *The beginning and end of rape: confronting sexual violence in native America.*  
307 Minneapolis: University of Minnesota Press; 2015. 207 p.
- 308 3. Evans-Campbell T, Lindhorst T, Huang B, Walters KL. Interpersonal Violence in the Lives  
309 of Urban American Indian and Alaska Native Women: Implications for Health, Mental  
310 Health, and Help-Seeking. *Am J Public Health.* 2006 Aug;96(8):1416–22.
- 311 4. Rosay AB. *Violence Against American Indian and Alaska Native Women and Men.* 2016  
312 Sep;8.
- 313 5. Wahab S, Olson L. Intimate Partner Violence and Sexual Assault in Native American  
314 Communities. *Trauma Violence Abuse.* 2004 Oct 1;5(4):353–66.
- 315 6. Walters KL, Simoni JM. Decolonizing Strategies for Mentoring American Indians and  
316 Alaska Natives in HIV and Mental Health Research. *Am J Public Health.* 2009 Apr  
317 1;99(S1):S71–6.
- 318 7. CDC. The National Intimate Partner and Sexual Violence Survey (NISVS) |Violence  
319 Prevention|Injury Center|CDC [Internet]. Violence Prevention. 2019 [cited 2019 Oct 13].  
320 Available from: <https://www.cdc.gov/violenceprevention/datasources/nisvs/index.html>
- 321 8. Basile KC, Smith SG, In C. Americans. *The National Violence Against Women Survey*  
322 (NVAWS),. 2011.
- 323 9. Weaver HN. The Colonial Context of Violence: Reflections on Violence in the Lives of  
324 Native American Women. *J Interpers Violence.* 2009 Sep 1;24(9):1552–63.
- 325 10. Meyer S. Still blaming the victim of intimate partner violence? Women’s narratives of victim  
326 desistance and redemption when seeking support. *Theor Criminol.* 2016 Feb 1;20(1):75–90.

- 327 11. Goodson A, Hayes BE. Help-Seeking Behaviors of Intimate Partner Violence Victims: A  
328 Cross-National Analysis in Developing Nations. *J Interpers Violence*. 2018 Aug  
329 23;0886260518794508.
- 330 12. Tenkorang EY, Sedziafa AP, Owusu AY. Does Type and Severity of Violence Affect the  
331 Help-Seeking Behaviors of Victims of Intimate Partner Violence in Nigeria? *J Fam Issues*.  
332 2017 Oct 1;38(14):2026–46.
- 333 13. Rasool S. Help-Seeking After Domestic Violence: The Critical Role of Children. *J Interpers*  
334 *Violence*. 2016 May 1;31(9):1661–86.
- 335 14. Gover AR, Tomsich EA, Richards TN. Victimization and Help-Seeking Among Survivors of  
336 Intimate Partner Violence. 2015 Mar 4 [cited 2019 Nov 22]; Available from:  
337 [https://www.oxfordhandbooks.com/view/10.1093/oxfordhb/9780199935383.001.0001/oxfo](https://www.oxfordhandbooks.com/view/10.1093/oxfordhb/9780199935383.001.0001/oxfordhb-9780199935383-e-58)  
338 [rdhb-9780199935383-e-58](https://www.oxfordhandbooks.com/view/10.1093/oxfordhb/9780199935383.001.0001/oxfordhb-9780199935383-e-58)
- 339 15. Kim E, Hogge I. Intimate Partner Violence among Asian Indian Women in the United States:  
340 Recognition of Abuse and Help-Seeking Attitudes. *Int J Ment Health*. 2015 Jul  
341 3;44(3):200–14.
- 342 16. Spencer RA, Shahroui M, Halasa L, Khalaf I, Clark CJ. Women’s Help Seeking for Intimate  
343 Partner Violence in Jordan. *Health Care Women Int*. 2014 Apr 3;35(4):380–99.
- 344 17. Evans MA, Feder GS. Help-seeking amongst women survivors of domestic violence: a  
345 qualitative study of pathways towards formal and informal support. *Health Expect*.  
346 2016;19(1):62–73.
- 347 18. Burnette CE. Family and cultural protective factors as the bedrock of resilience and growth  
348 for Indigenous women who have experienced violence. *J Fam Soc Work*. 2018 Jan  
349 1;21(1):45–62.
- 350 19. Stata Software [Internet]. 2020 [cited 2020 Jan 22]. Available from:  
351 <https://www.stata.com/why-use-stata/>
- 352 20. Asante-Muhammad D, Kamra E, Sanchez C, Ramirez K, Tec R. Racial Wealth Snapshot:  
353 Native Americans » NCRC [Internet]. 2022 [cited 2022 Feb 25]. Available from:  
354 <https://ncrc.org/racial-wealth-snapshot-native-americans/>
- 355 21. Tjaden P, Thoennes N. Full Report of the Prevalence, Incidence, and Consequences of  
356 Violence Against Women: (514172006-001) [Internet]. American Psychological  
357 Association; 2000 [cited 2020 Jan 17]. Available from: [http://doi.apa.org/get-pe-](http://doi.apa.org/get-pe-doi.cfm?doi=10.1037/e514172006-001)  
358 [doi.cfm?doi=10.1037/e514172006-001](http://doi.apa.org/get-pe-doi.cfm?doi=10.1037/e514172006-001)
